# Supplementary material for: N-Heterocyclic carbene-catalyzed synthesis of functionalized 3-hydroxypyrrolidinones via a domino aza-Michael/aldol reaction
Source: Royal Society of Chemistry journal article supplement (doi:10.1039/c4nj02420f), 2015-01-01

Electronic Supplementary Material (ESI) for New Journal of Chemistry.

## **N-heterocyclic carbene - Catalyzed Synthesis of Functionalized 3-hydroxypyrrolidinones via an Aza-Michael/Aldol Domino Reaction**

Yanfang Zhu, Chun Cai\*

Chemical Engineering College, Nanjing University of Science & Technology, 200 Xiaolingwei,  
Nanjing 210094, P. R. China

### **Table of Contents**

|                                                        |     |
|--------------------------------------------------------|-----|
| General information                                    | S2  |
| General procedures for the preparation of the products | S2  |
| Spectra data of products                               | S3  |
| Copies of <sup>1</sup> H and <sup>13</sup> C-NMR       | S7  |
| Copies of NOESY <sup>1</sup> HNMR                      | S18 |

---

\* Corresponding author. Tel.: +86-25-84315514; fax: +86-25-84315030; e-mail: [c.cai@mail.njust.edu.cn](mailto:c.cai@mail.njust.edu.cn)

## 1 Experimental

### 1.1 General Remarks

All of the reagents and solvents were commercially available and used without further purification. GC analyses were performed on an Agilent 7890A instrument.  $^1\text{H}$  NMR and  $^{13}\text{C}$  NMR were recorded on Bruker DRX 500 and tetramethylsilane (TMS) was used as a reference. The  $^1\text{H}$  NMR spectroscopic data of these precatalysts and products are in agreement with those reported in the literatures.<sup>1-7</sup>

### 1.2 General procedure for the Synthesis of 3-hydroxypyrrolidinones (3).

Under  $\text{N}_2$  atmosphere, to a solution of catalyst precursor A (0.03 mmol), 1 (0.36 mmol) and 2 (0.3 mmol) in ethanol (2 mL) was added the  $\text{KO}^t\text{Bu}$  (0.45 mmol). The reaction was stirred at rt (monitored by TLC) before it was quenched with  $\text{NH}_4\text{Cl}$  (4mL, sat. aq.). The layers were separated and the aqueous layer was extracted with EtOAc. The combined organic layers were washed with brine (5 mL), dried ( $\text{Na}_2\text{SO}_4$ ) and concentrated in vacuo. Flash column chromatography afforded 3-hydroxypyrrolidinones.

## 2. Characterization Data

### 4-benzoyl-3-hydroxy-1, 3, 5-triphenylpyrrolidin-2-one (**3a**)

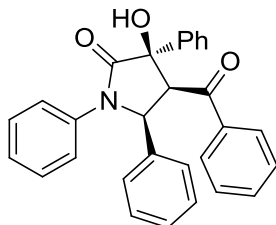

White solid; 75% yield.  $^1\text{H}$  NMR (500 MHz, DMSO)  $\delta$  7.44 (dd,  $J = 16.9, 7.8$  Hz, 4H), 7.39 – 7.33 (m, 3H), 7.32 – 7.25 (m, 5H), 7.23 (t,  $J = 7.7$  Hz, 2H), 7.18 (d,  $J = 7.7$  Hz, 2H), 7.10 (dt,  $J = 22.6, 7.6$  Hz, 4H), 6.83 (s, 1H), 6.16 (d,  $J = 8.2$  Hz, 1H), 4.27 (d,  $J = 8.2$  Hz, 1H);  $^{13}\text{C}$  NMR (126 MHz, DMSO)  $\delta$  193.88, 171.40, 141.22, 138.56, 136.82, 136.20, 132.35, 128.14, 127.91, 127.43, 127.24, 126.90, 125.73, 124.99, 123.60, 79.73, 63.41, 60.17; MS ( $\text{M}^+$ ), found 433; Anal. calcd for  $\text{C}_{29}\text{H}_{23}\text{NO}_3$ : C, 80.15; H, 5.55; N, 3.39; Found: C, 80.35; H, 5.35; N, 3.23.

### 4-benzoyl-3-hydroxy-5-(4-methoxyphenyl)-1, 3-diphenylpyrrolidin-2-one (**3b**)

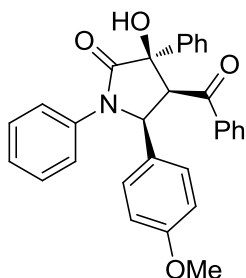

White solid; 69% yield.  $^1\text{H}$  NMR (500 MHz, DMSO)  $\delta$  7.46 (d,  $J = 8.1$  Hz, 2H), 7.43 – 7.34 (m, 5H), 7.34 – 7.25 (m, 5H), 7.19 (d,  $J = 7.8$  Hz, 2H), 7.11 (dd,  $J = 16.3, 8.5$  Hz, 3H), 6.84 – 6.72 (m, 3H), 6.12 (d,  $J = 8.2$  Hz, 1H), 4.27 (d,  $J = 8.3$  Hz, 1H), 3.63 (s, 3H);  $^{13}\text{C}$  NMR (126 MHz, DMSO)  $\delta$  195.03, 172.39, 159.23, 142.38, 137.94, 137.33, 133.41, 131.28, 129.27, 128.96, 128.50, 128.31, 127.95, 126.82, 126.06, 124.84, 114.60, 80.82, 64.61, 60.84, 55.46; MS ( $\text{M}^+$ ), found 463; Anal. calcd for  $\text{C}_{30}\text{H}_{25}\text{NO}_4$ : C, 77.74; H, 5.44; N, 3.02; Found: C, 77.54; H, 5.59; N, 3.32.

### 4-benzoyl-5-(4-chlorophenyl)-3-hydroxy-1, 3-diphenylpyrrolidin-2-one (**3c**)

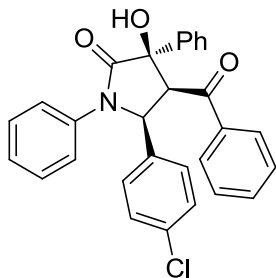

White solid; 75% yield.  $^1\text{H}$  NMR (500 MHz, DMSO)  $\delta$  7.52 – 7.46 (m, 4H), 7.41 – 7.34 (m, 3H), 7.30 (dd,  $J = 17.1, 8.1$  Hz, 7H), 7.22 (d,  $J = 7.8$  Hz, 2H), 7.14 – 7.04 (m, 3H), 6.89 (s, 1H), 6.22 (d,  $J = 8.2$  Hz, 1H), 4.31 (d,  $J = 8.2$  Hz, 1H).  $^{13}\text{C}$  NMR (126 MHz, DMSO)  $\delta$  195.04, 172.49, 142.10, 138.56,

Electronic Supplementary Material (ESI) for New Journal of Chemistry.

137.74, 137.25, 133.44, 132.98, 130.06, 129.22, 129.08, 128.62, 128.46, 128.29, 128.03, 126.92, 126.20, 124.69, 80.84, 64.30, 60.64; MS ( $M^+$ ), found 467; Anal. calcd for  $C_{29}H_{22}ClNO_3$ : C, 74.44; H, 4.74; N, 2.99; Found: C, 74.14; H, 4.94; N, 2.76.

4-benzoyl-3-hydroxy-1, 3-diphenyl-5-(2-(trifluoromethyl) phenyl) pyrrolidin-2-one  
(3d)

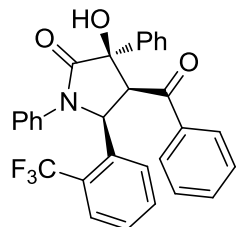

White solid; 52% yield.  $^1H$  NMR (500 MHz, DMSO)  $\delta$  7.63 (d,  $J = 7.8$  Hz, 2H), 7.58 (d,  $J = 7.7$  Hz, 1H), 7.48 (dd,  $J = 17.5, 9.1$  Hz, 5H), 7.37 (d,  $J = 4.0$  Hz, 2H), 7.32 (t,  $J = 7.4$  Hz, 5H), 7.26 (dd,  $J = 14.8, 7.1$  Hz, 3H), 7.12 (t,  $J = 7.4$  Hz, 1H), 6.72 (s, 1H), 6.19 (d,  $J = 3.2$  Hz, 1H), 4.60 (d,  $J = 3.2$  Hz, 1H).  $^{13}C$  NMR (126 MHz, DMSO)  $\delta$  196.27, 173.21, 142.18, 137.98, 137.91, 137.78, 133.67, 133.17, 129.56, 129.13, 129.03, 128.76, 128.69, 127.07, 126.70, 123.98, 80.38, 59.11, 58.26; MS ( $M^+$ ), found 501; Anal. calcd for  $C_{30}H_{22}F_3NO_3$ : C, 71.85; H, 4.42; N, 2.79; Found: C, 71.77; H, 4.62; N, 2.91.

4-benzoyl-3-hydroxy-1, 3-diphenyl-5-(3-(trifluoromethyl)phenyl)pyrrolidin-2-one  
(3e)

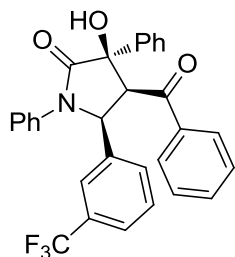

White solid; 70% yield.  $^1H$  NMR (500 MHz, DMSO)  $\delta$  7.93 – 7.64 (m, 2H), 7.48 (dt,  $J = 25.2, 8.2$  Hz, 4H), 7.43 – 7.34 (m, 3H), 7.34 – 7.21 (m, 7H), 7.09 (q,  $J = 8.1$  Hz, 3H), 6.89 (d,  $J = 9.6$  Hz, 1H), 6.32 (t,  $J = 8.6$  Hz, 1H), 4.40 (t,  $J = 6.9$  Hz, 1H).  $^{13}C$  NMR (126 MHz, DMSO)  $\delta$  195.39, 172.59, 141.85, 140.81, 137.68, 137.34, 133.39, 132.18, 130.31, 129.12, 128.68, 128.42, 128.24, 128.05, 127.02, 126.27, 125.23, 125.03, 124.66, 80.85, 63.77, 60.85; MS ( $M^+$ ), found 501; Anal. calcd for  $C_{30}H_{22}F_3NO_3$ : C, 71.85; H, 4.42; N, 2.79; Found: C, 71.75; H, 4.59; N, 2.99.

4-benzoyl-3-hydroxy-1, 3-diphenyl-5-(4-(trifluoromethyl) phenyl) pyrrolidin-2-one  
(3f)

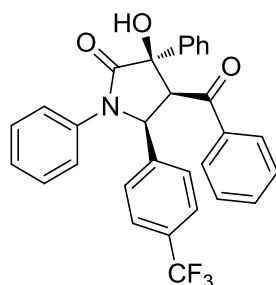

Electronic Supplementary Material (ESI) for New Journal of Chemistry.

White solid; 72% yield.  $^1\text{H}$  NMR (500 MHz, DMSO)  $\delta$  7.70 (d,  $J = 8.2$  Hz, 2H), 7.60 (d,  $J = 8.4$  Hz, 2H), 7.51 (d,  $J = 8.3$  Hz, 2H), 7.41 – 7.35 (m, 3H), 7.35 – 7.30 (m, 2H), 7.28 (dd,  $J = 6.4, 3.6$  Hz, 3H), 7.23 (d,  $J = 7.7$  Hz, 2H), 7.10 (dt,  $J = 19.9, 7.8$  Hz, 3H), 6.93 (s, 1H), 6.33 (d,  $J = 8.1$  Hz, 1H), 4.35 (d,  $J = 8.2$  Hz, 1H);  $^{13}\text{C}$  NMR (126 MHz, DMSO)  $\delta$  195.04, 172.58, 144.38, 141.98, 137.71, 137.23, 133.44, 129.14, 128.99, 128.67, 128.43, 128.27, 128.04, 126.92, 126.23, 126.08, 124.49, 80.81, 64.06, 60.71; MS ( $\text{M}^+$ ), found 501; Anal. calcd for  $\text{C}_{30}\text{H}_{22}\text{F}_3\text{NO}_3$ : C, 71.85; H, 4.42; N, 2.79 ; Found: C, 71.85; H, 4.58; N, 2.85.

4-(3-chlorobenzoyl)-3-hydroxy-1, 3, 5-triphenylpyrrolidin-2-one (**3g**)

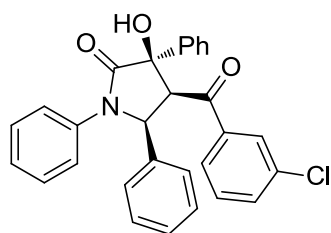

White solid; 64% yield.  $^1\text{H}$  NMR (500 MHz, DMSO)  $\delta$  7.40 (d,  $J = 7.9$  Hz, 5H), 7.30 (d,  $J = 3.9$  Hz, 2H), 7.24 (t,  $J = 7.7$  Hz, 5H), 7.19 (t,  $J = 7.6$  Hz, 3H), 7.14 – 7.00 (m, 4H), 6.86 (s, 1H), 6.10 (d,  $J = 8.2$  Hz, 1H), 4.25 (d,  $J = 8.2$  Hz, 1H).  $^{13}\text{C}$  NMR (126 MHz, DMSO)  $\delta$  193.16, 171.27, 140.90, 138.26, 137.90, 136.74, 132.48, 132.06, 129.37, 128.09, 127.91, 127.58, 127.33, 127.24, 127.14, 125.92, 125.70, 125.05, 123.66, 79.68, 63.63, 59.97; MS ( $\text{M}^+$ ), found 467; Anal. calcd for  $\text{C}_{29}\text{H}_{22}\text{ClNO}_3$ : C, 74.44; H, 4.74; N, 2.99; Found: C, 74.68; H, 4.54; N, 2.79.

4-(4-chlorobenzoyl)-3-hydroxy-1, 3, 5-triphenylpyrrolidin-2-one (**3h**)

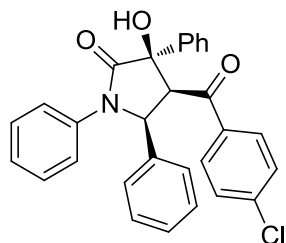

White solid; 67% yield.  $^1\text{H}$  NMR (500 MHz, DMSO)  $\delta$  7.45 (dd,  $J = 13.2, 7.7$  Hz, 4H), 7.35 (dt,  $J = 9.4, 3.4$  Hz, 2H), 7.32 – 7.25 (m, 5H), 7.26 – 7.16 (m, 4H), 7.16 – 7.06 (m, 4H), 6.91 (s, 1H), 6.16 (d,  $J = 8.1$  Hz, 1H), 4.28 (d,  $J = 8.2$  Hz, 1H).  $^{13}\text{C}$  NMR (126 MHz, DMSO)  $\delta$  194.27, 172.39, 142.07, 139.45, 138.34, 137.85, 136.02, 130.39, 129.22, 129.01, 128.56, 128.36, 128.10, 126.85, 126.12, 124.70, 80.77, 64.57, 61.10 ; MS ( $\text{M}^+$ ), found 467 Anal. calcd for  $\text{C}_{29}\text{H}_{22}\text{ClNO}_3$ : C, 74.44; H, 4.74; N, 2.99; Found: C, 74.63; H, 4.58; N, 2.68.

3-hydroxy-4-(4-methoxybenzoyl)-1, 3, 5-triphenylpyrrolidin-2-one (**3i**)

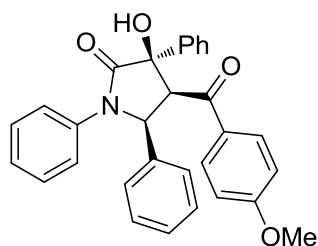

White solid; 71% yield.  $^1\text{H}$  NMR (500 MHz, DMSO)  $\delta$  7.45 (d,  $J$  = 8.1 Hz, 2H), 7.42 – 7.36 (m, 4H), 7.34 – 7.26 (m, 5H), 7.21 (t,  $J$  = 7.4 Hz, 2H), 7.17 – 7.06 (m, 4H), 6.76 (s, 1H), 6.58 (d,  $J$  = 8.1 Hz, 2H), 6.15 (d,  $J$  = 8.2 Hz, 1H), 4.19 (d,  $J$  = 8.1 Hz, 1H), 3.67 (s, 3H);  $^{13}\text{C}$  NMR (126 MHz, DMSO)  $\delta$  193.95, 171.31, 158.15, 141.30, 136.86, 136.25, 132.32, 130.21, 128.19, 127.87, 127.42, 127.22, 126.86, 125.74, 124.97, 123.76, 113.52, 79.74, 63.53, 59.76, 54.38 ; MS ( $\text{M}^+$ ), found 463; Anal. calcd for  $\text{C}_{30}\text{H}_{25}\text{NO}_4$ : C, 77.74; H, 5.44; N, 3.02; Found: C, 77.48; H, 5.69; N, 3.28.

4-benzoyl-1-(4-fluorophenyl)-3-hydroxy-3,5-diphenylpyrrolidin-2-one (**3j**)

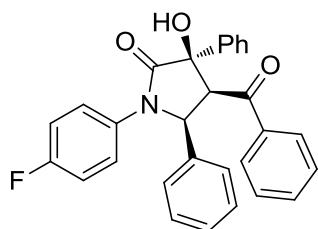

White solid; 65% yield.  $^1\text{H}$  NMR (500 MHz, DMSO)  $\delta$  7.45 (dd,  $J$  = 11.9, 8.1 Hz, 4H), 7.35 (d,  $J$  = 3.2 Hz, 2H), 7.30 (t,  $J$  = 7.5 Hz, 5H), 7.27 – 7.18 (m, 4H), 7.18 – 7.08 (m, 4H), 6.90 (s, 1H), 6.15 (d,  $J$  = 8.1 Hz, 1H), 4.29 (d,  $J$  = 8.1 Hz, 1H).  $^{13}\text{C}$  NMR (126 MHz, DMSO)  $\delta$  193.86, 171.42, 141.11, 138.03, 136.20, 133.13, 132.36, 128.17, 127.43, 127.23, 127.02, 126.91, 125.75, 114.80, 114.62, 79.66, 63.43, 60.44; MS ( $\text{M}^+$ ), found 451; Anal. calcd for  $\text{C}_{29}\text{H}_{22}\text{FNO}_3$ : C, 77.15; H, 4.91; N, 3.10; Found: C, 77.45; H, 4.76; N, 2.89.

4-benzoyl-3-hydroxy-1-(4-methoxyphenyl)-3,5-diphenylpyrrolidin-2-one (**3k**)

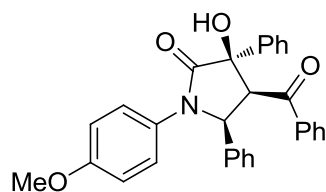

White solid; 78% yield.  $^1\text{H}$  NMR (500 MHz, DMSO)  $\delta$  7.43 (d,  $J$  = 7.6 Hz, 2H), 7.37 (dd,  $J$  = 15.5, 6.6 Hz, 5H), 7.31 – 7.21 (m, 5H), 7.21 – 7.13 (m, 3H), 7.09 (t,  $J$  = 7.7 Hz, 2H), 6.86 (d,  $J$  = 8.9 Hz, 2H), 6.81 (s, 1H), 6.09 (d,  $J$  = 8.2 Hz, 1H), 4.26 (d,  $J$  = 8.2 Hz, 1H), 3.69 (s, 3H).  $^{13}\text{C}$  NMR (126 MHz, DMSO)  $\delta$  195.05, 172.43, 157.45, 142.46, 139.71, 137.31, 133.42, 130.79, 129.22, 128.51, 128.32, 128.07, 127.94, 126.78, 126.38, 114.26, 80.73, 64.57, 61.64, 55.69; MS ( $\text{M}^+$ ), found 463; Anal. calcd for  $\text{C}_{30}\text{H}_{25}\text{NO}_4$ : C, 77.74; H, 5.44; N, 3.02; Found: C, 77.52; H, 5.59; N, 3.24.

### 3. NMR Spectra of Products

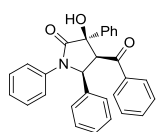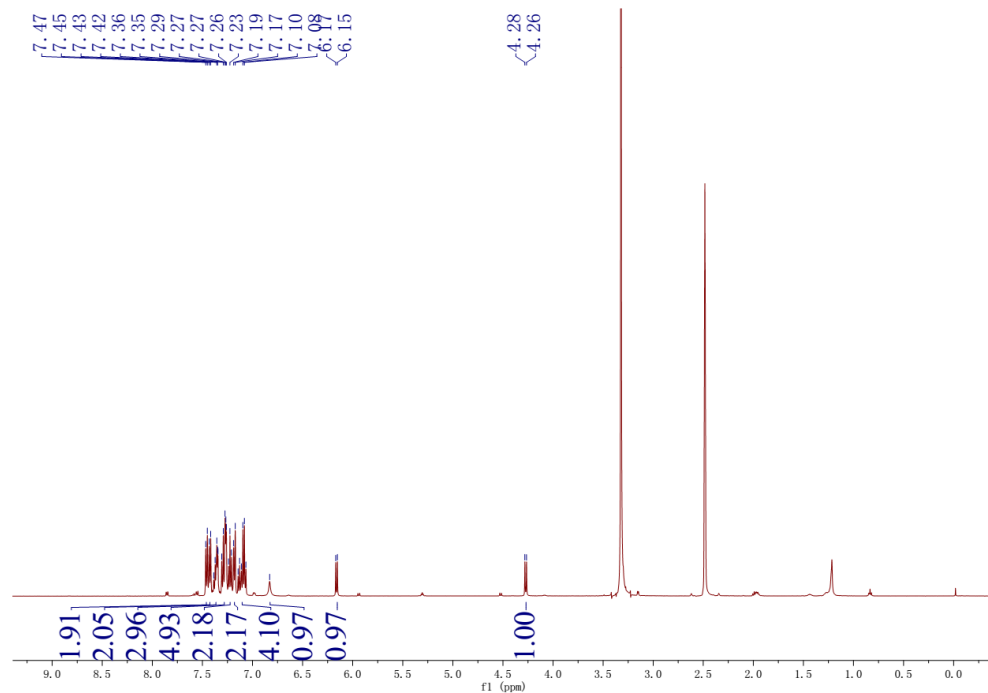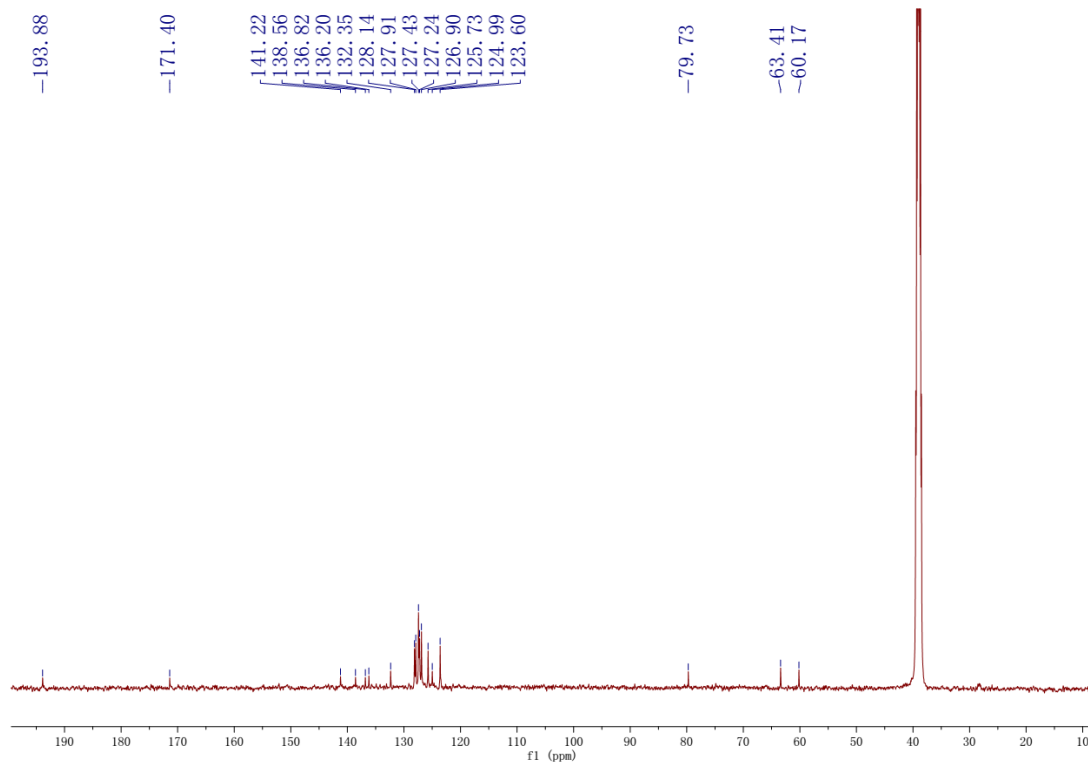

Electronic Supplementary Material (ESI) for New Journal of Chemistry.

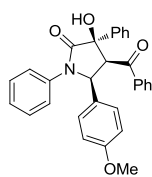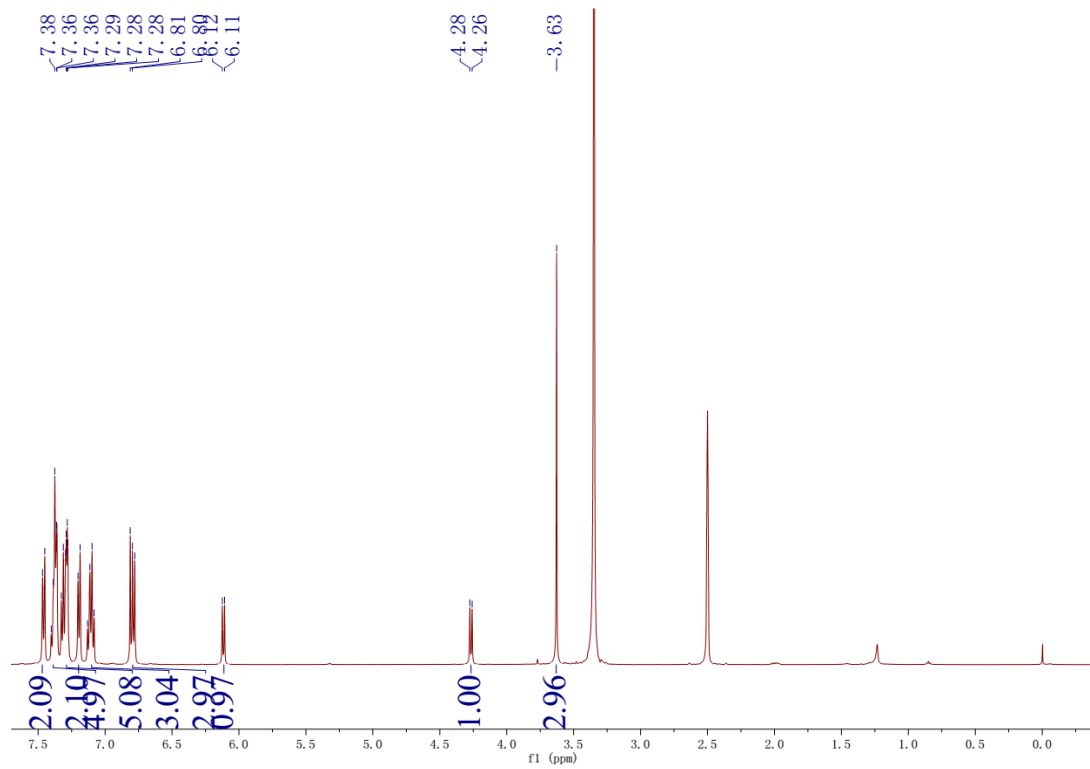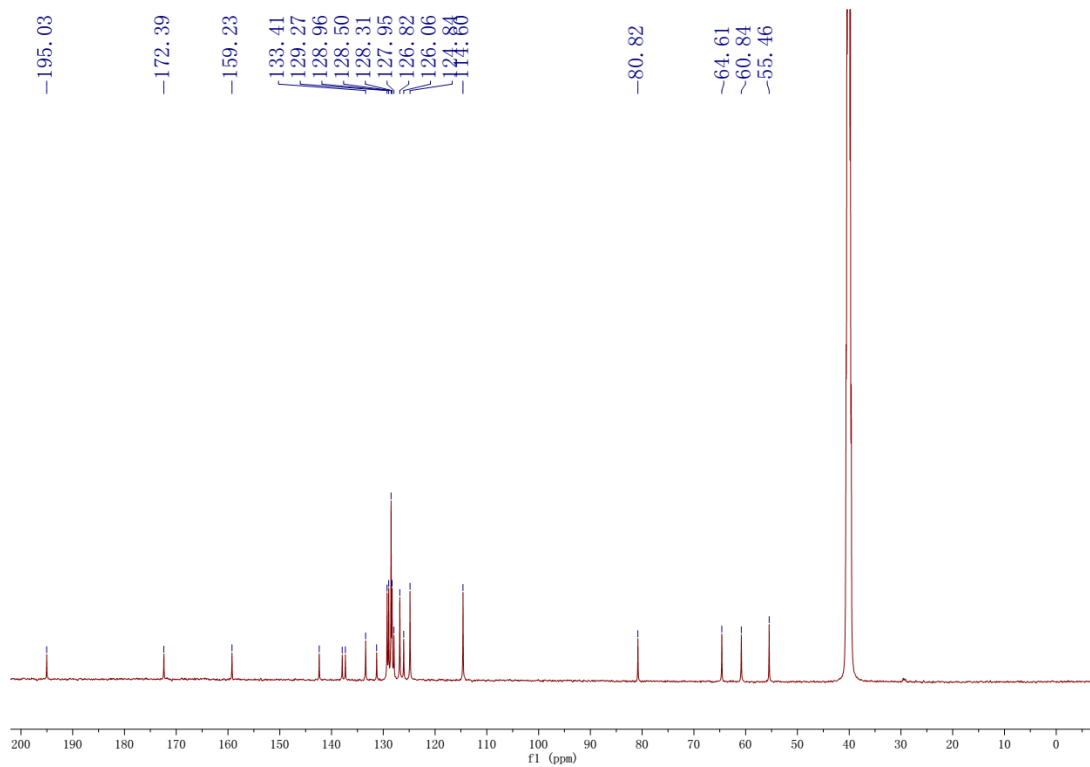



Electronic Supplementary Material (ESI) for New Journal of Chemistry.

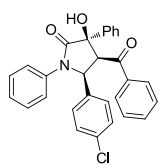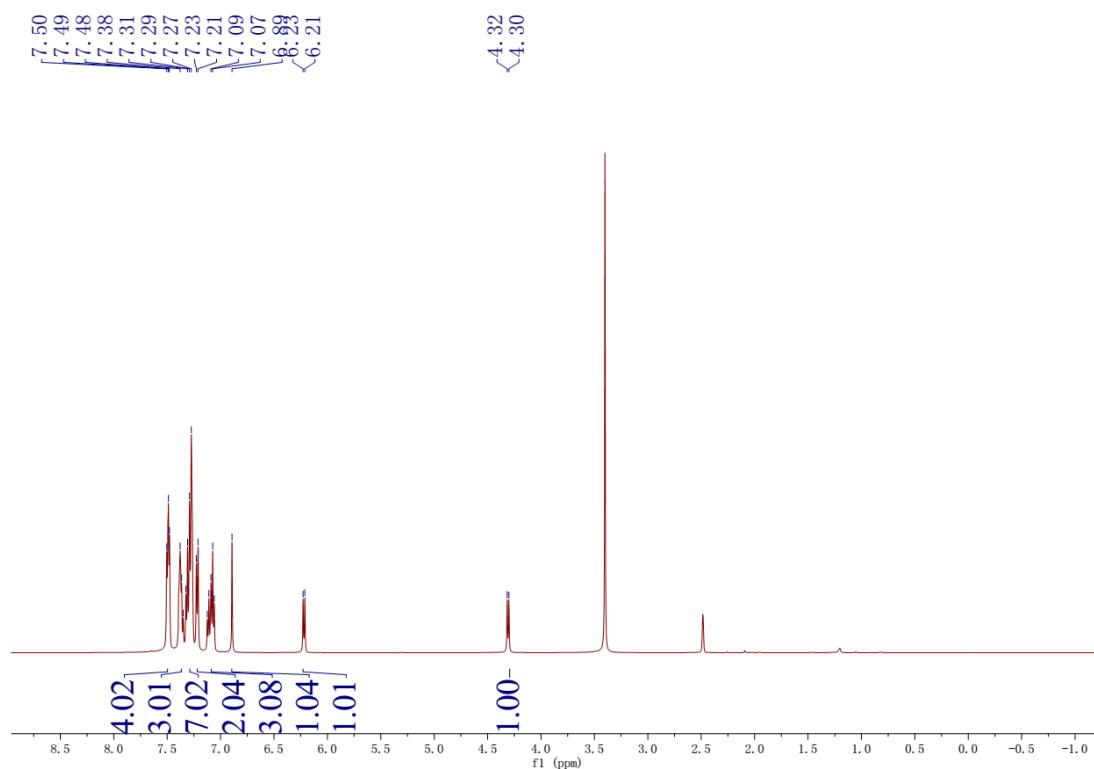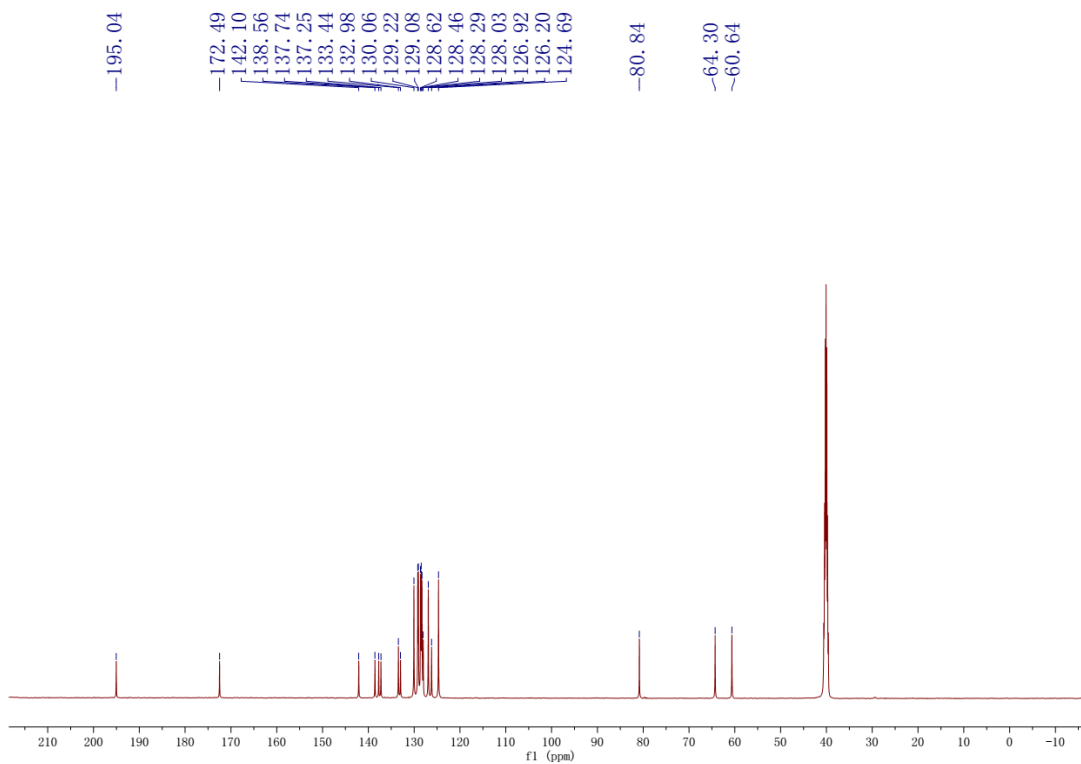

Electronic Supplementary Material (ESI) for New Journal of Chemistry.

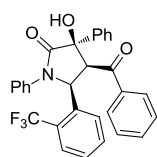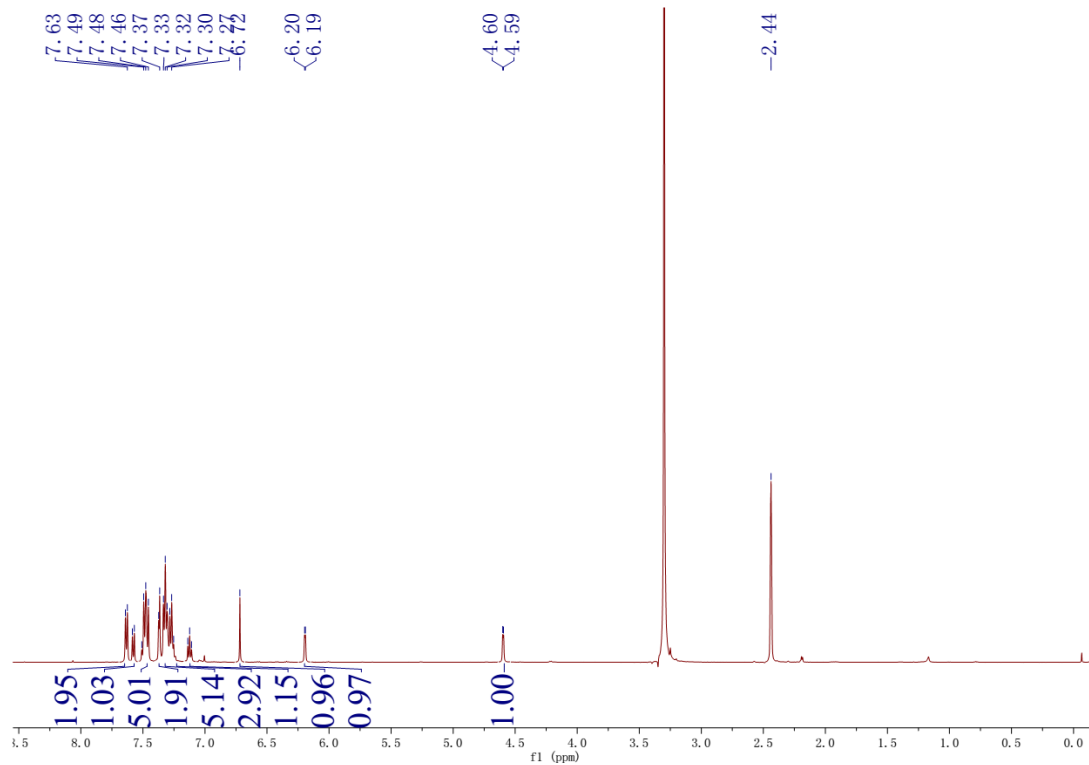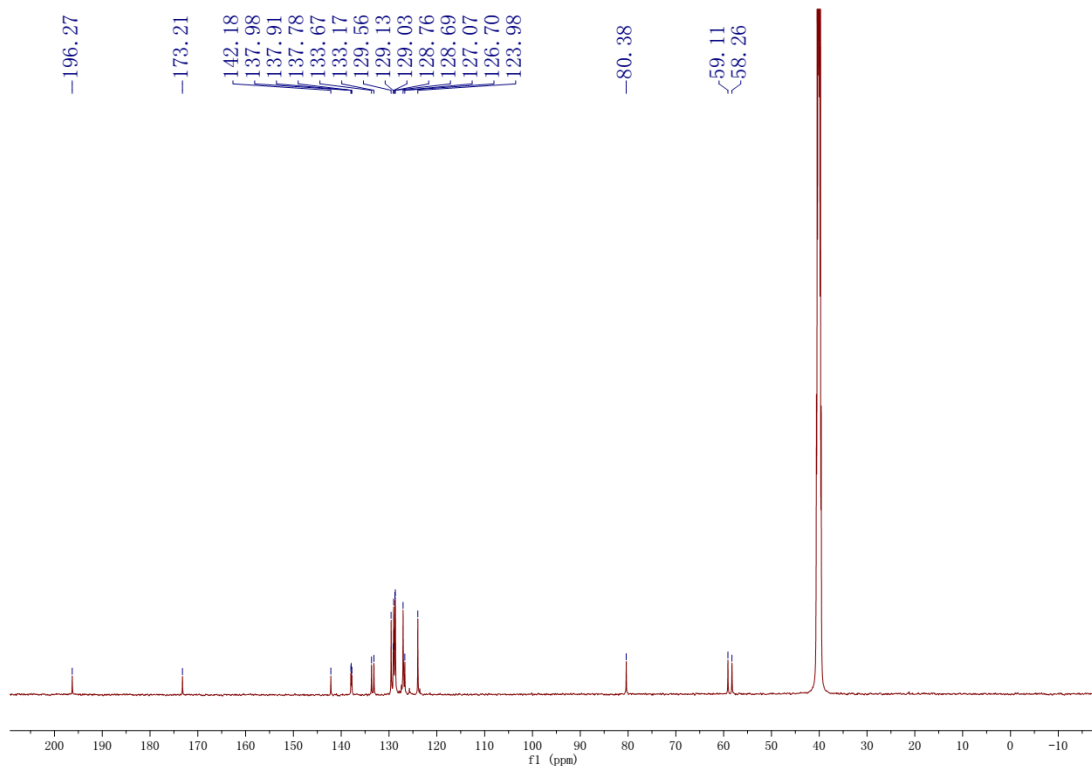

Electronic Supplementary Material (ESI) for New Journal of Chemistry.

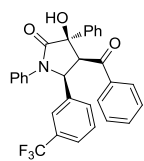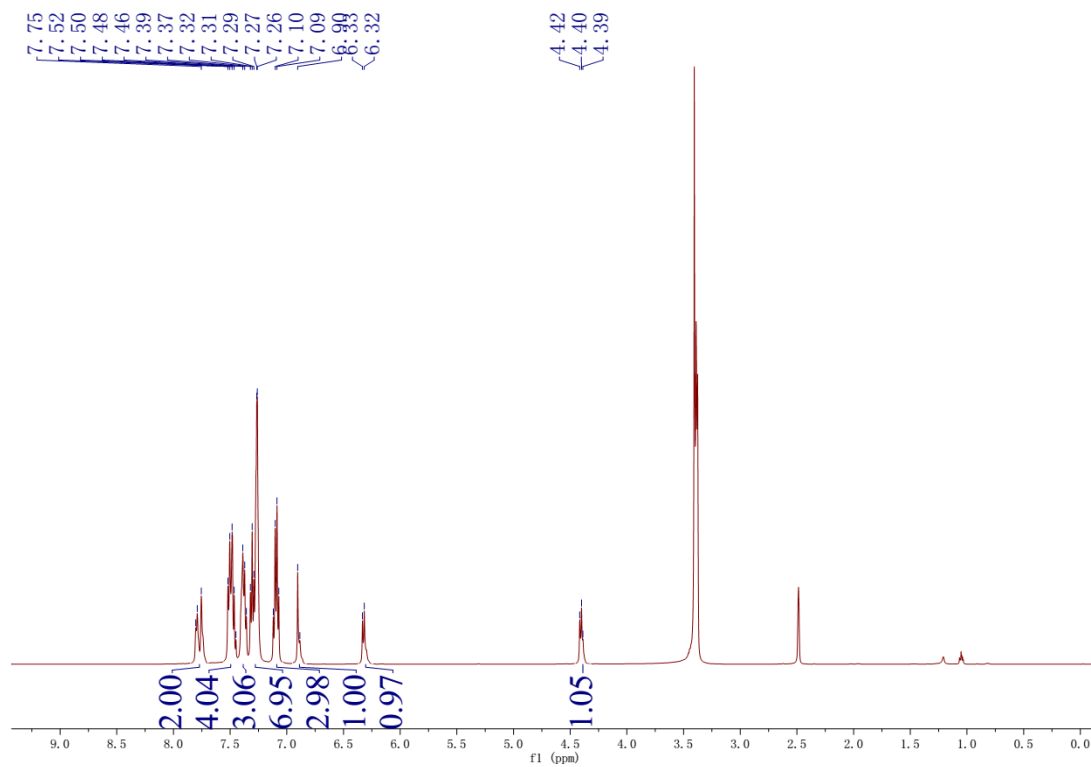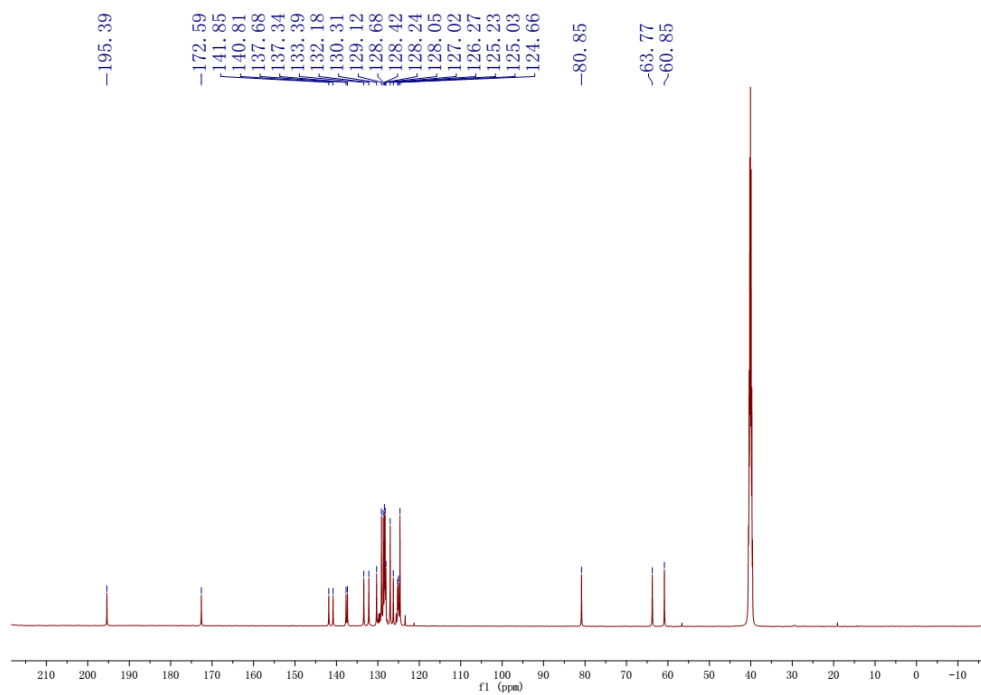

Electronic Supplementary Material (ESI) for New Journal of Chemistry.

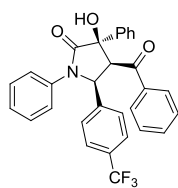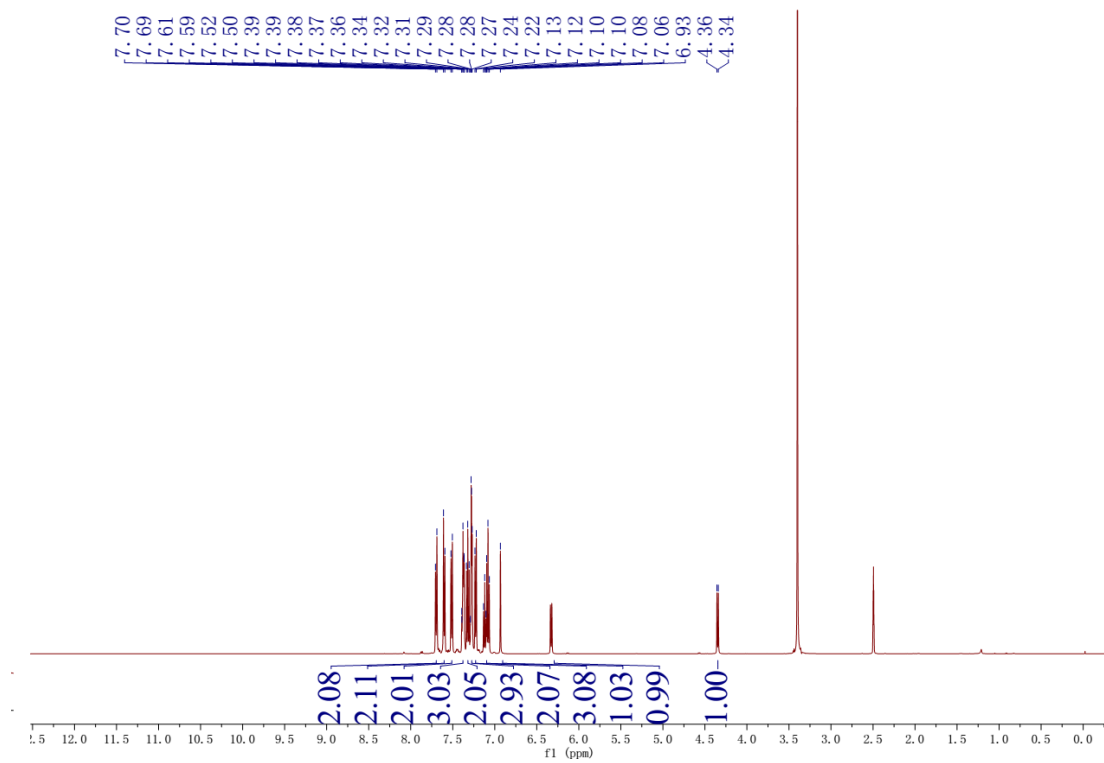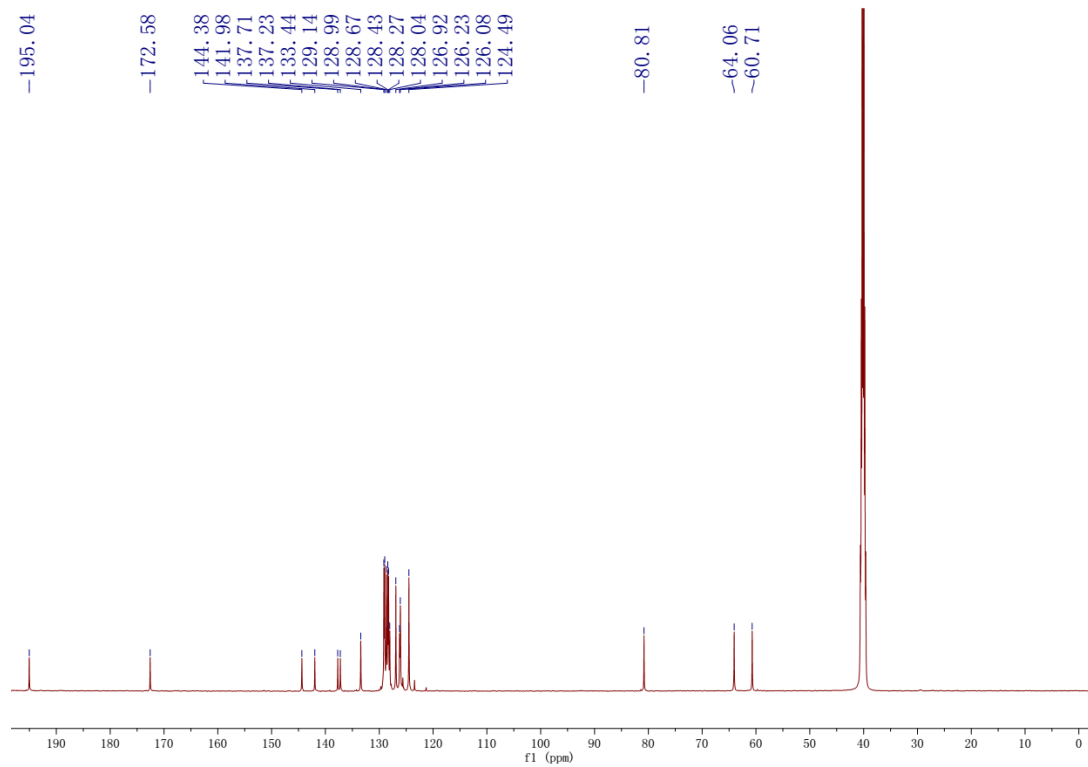

Electronic Supplementary Material (ESI) for New Journal of Chemistry.

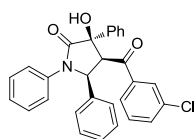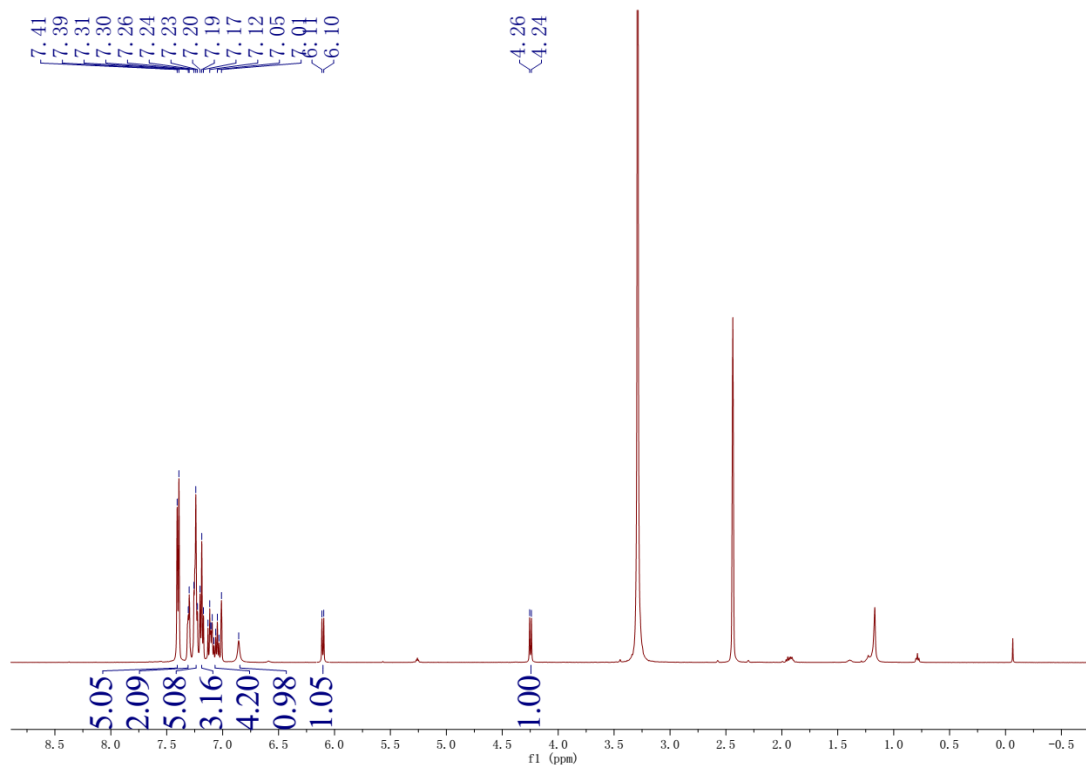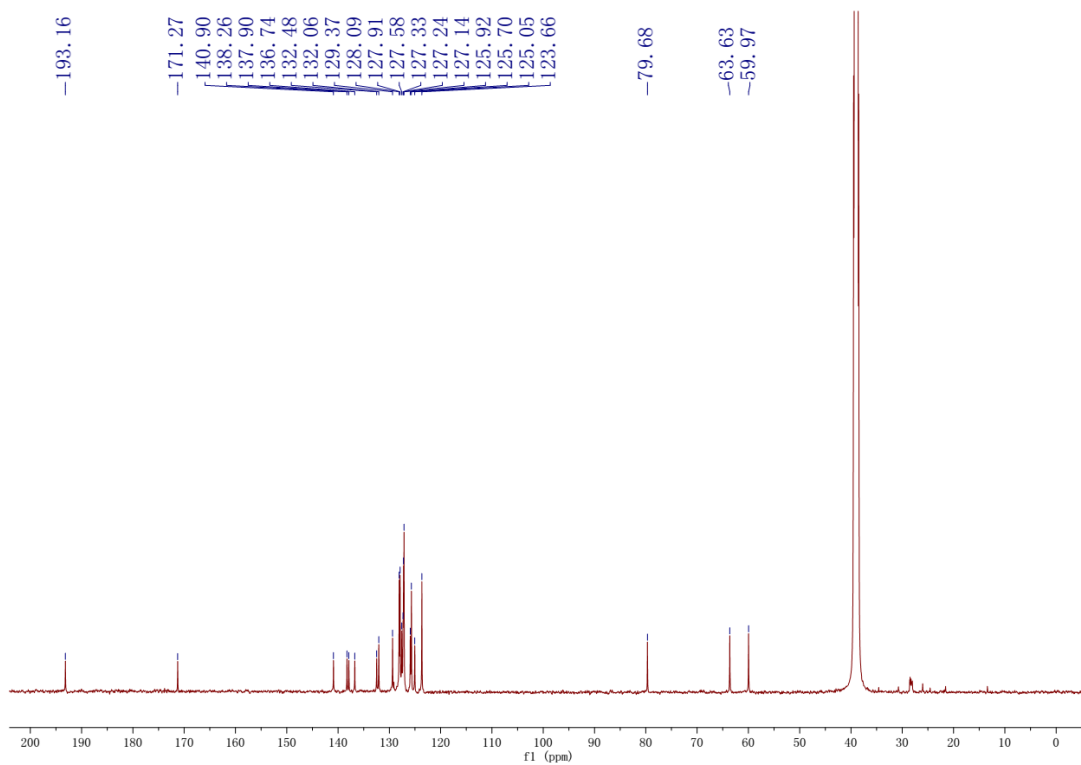

Electronic Supplementary Material (ESI) for New Journal of Chemistry.

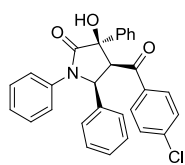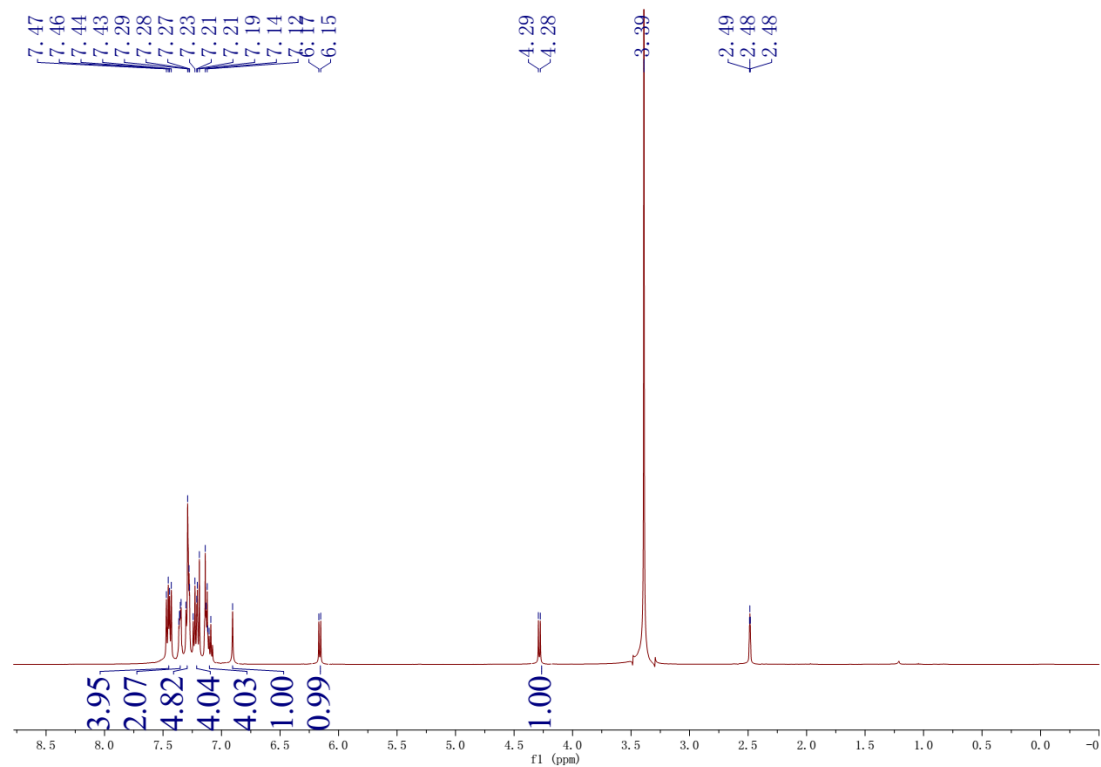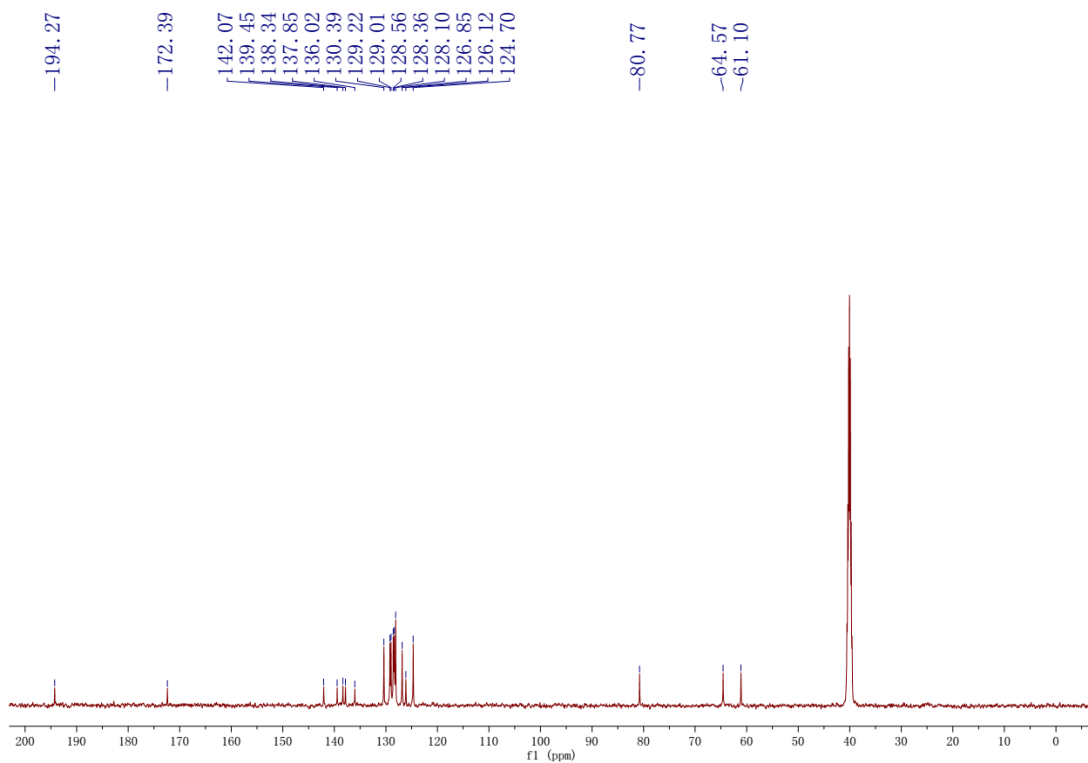

Electronic Supplementary Material (ESI) for New Journal of Chemistry.

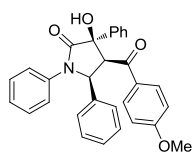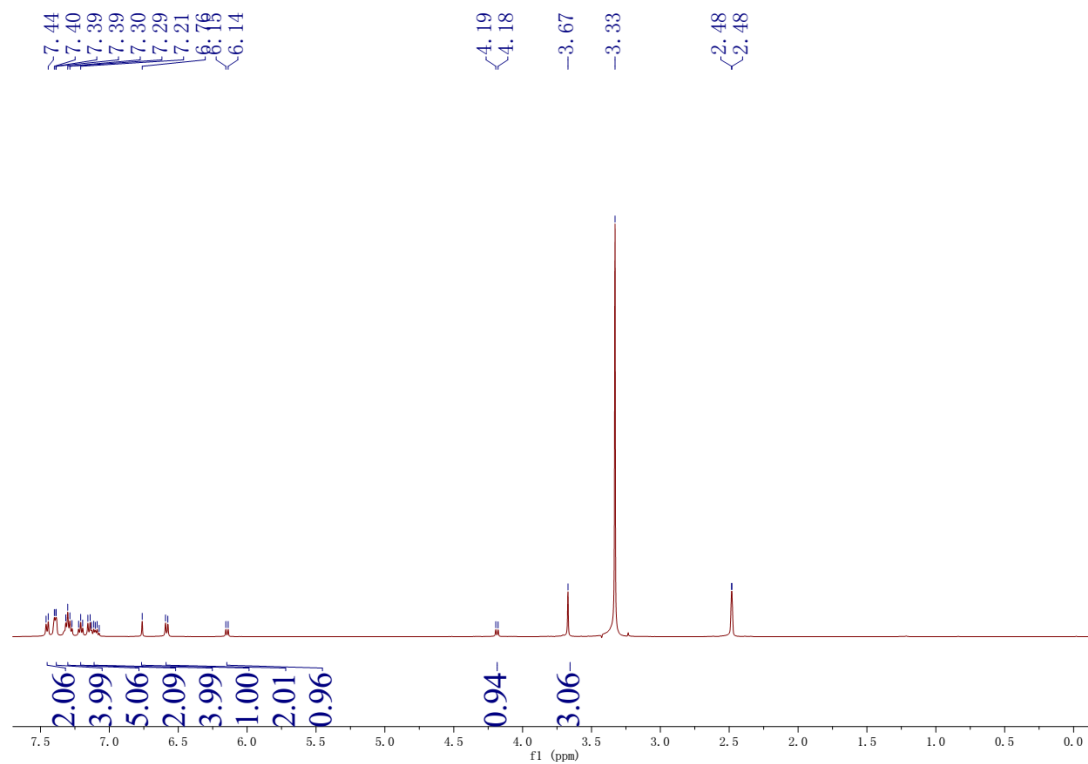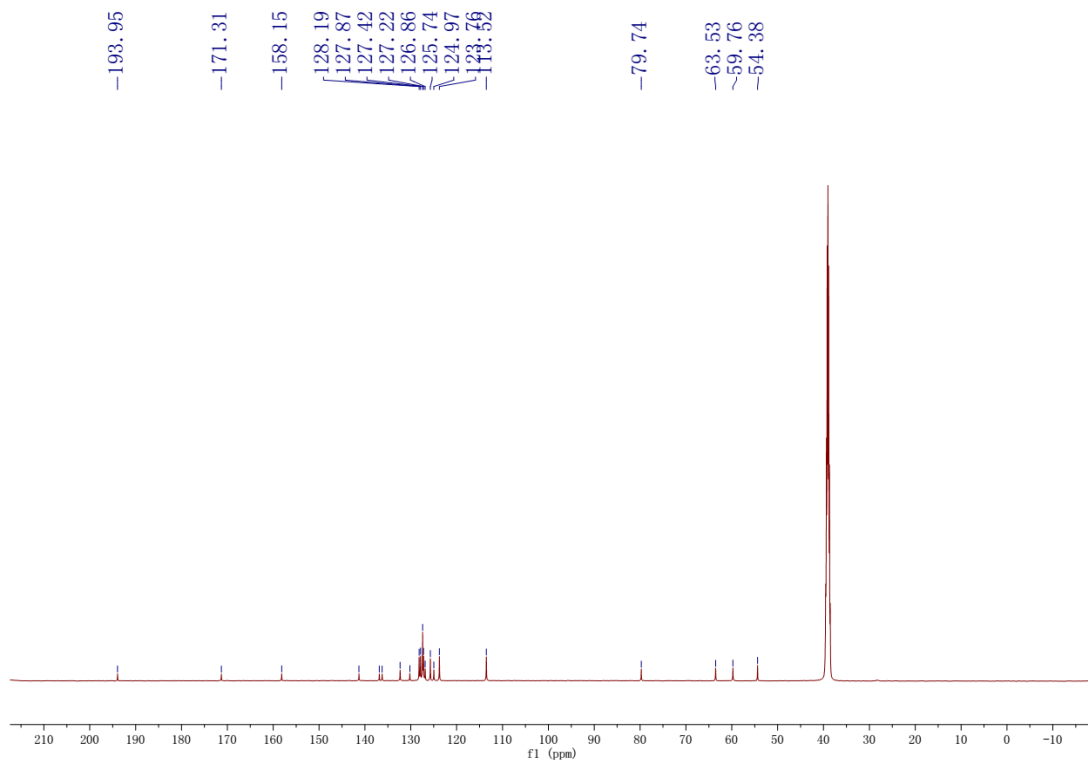

Electronic Supplementary Material (ESI) for New Journal of Chemistry.

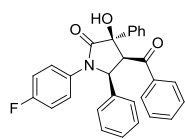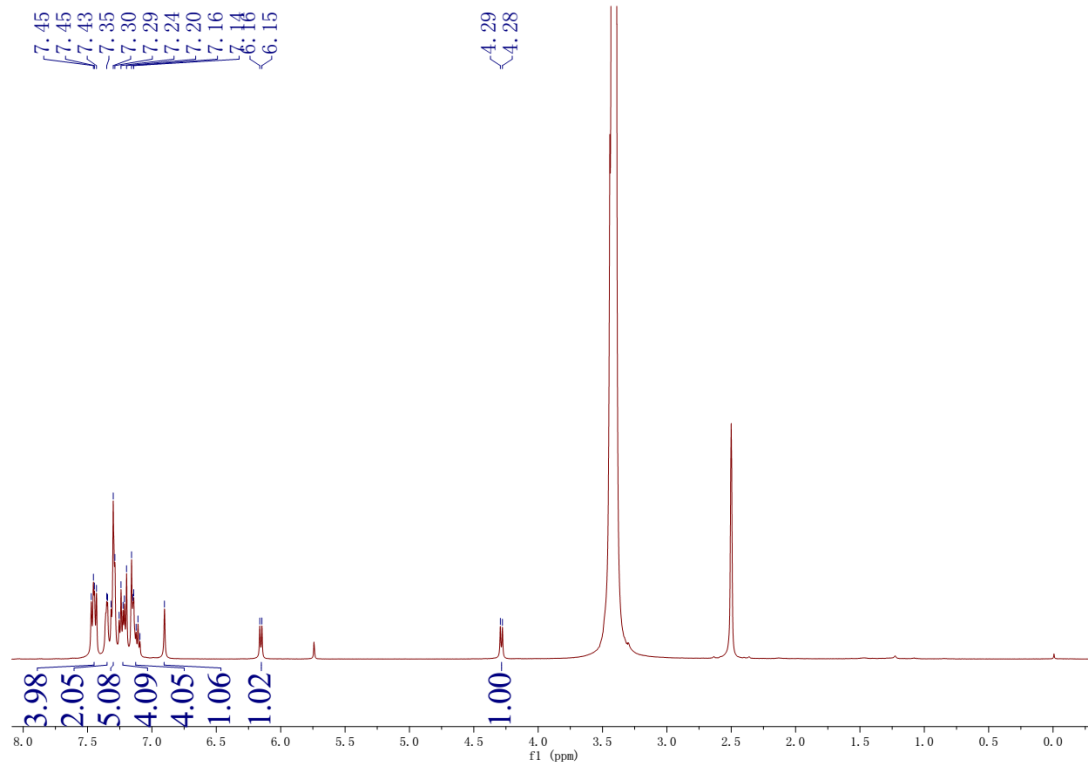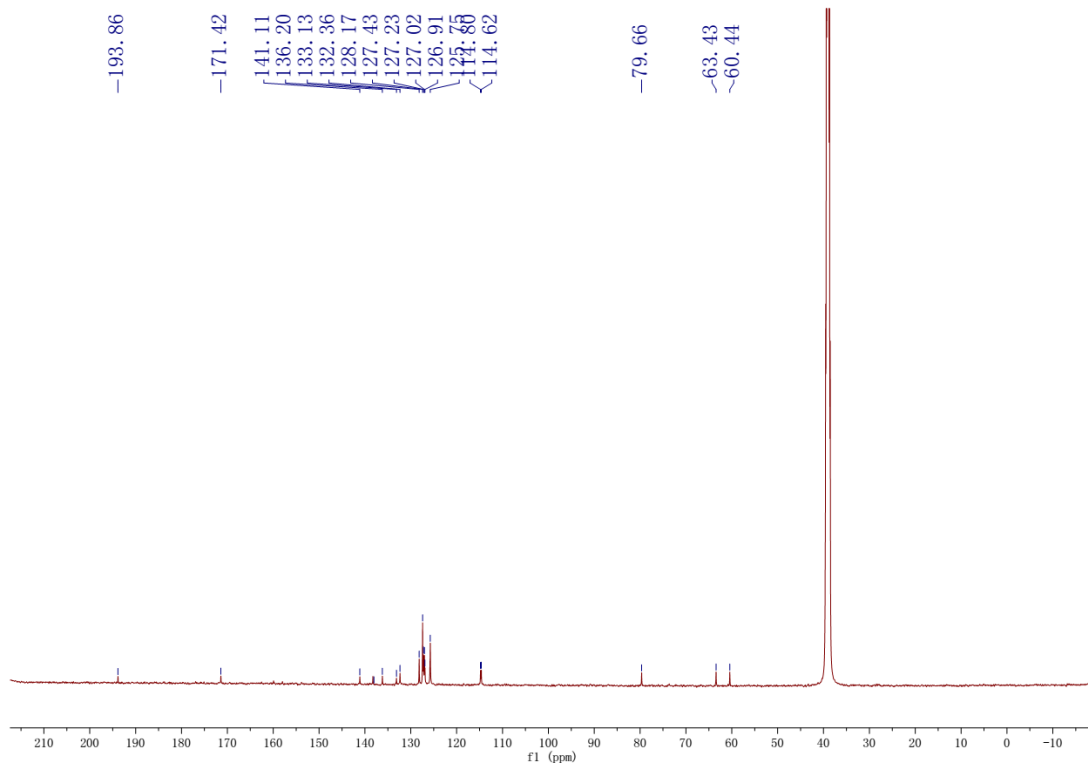



Electronic Supplementary Material (ESI) for New Journal of Chemistry.

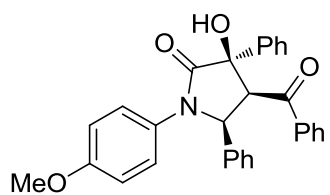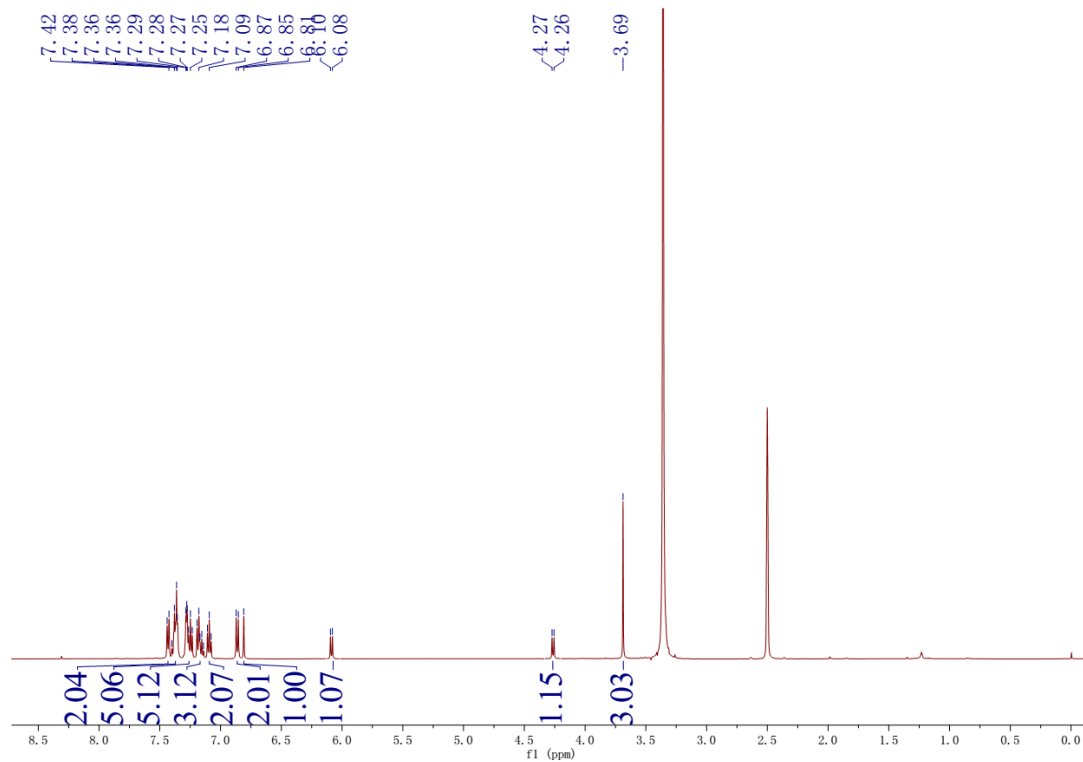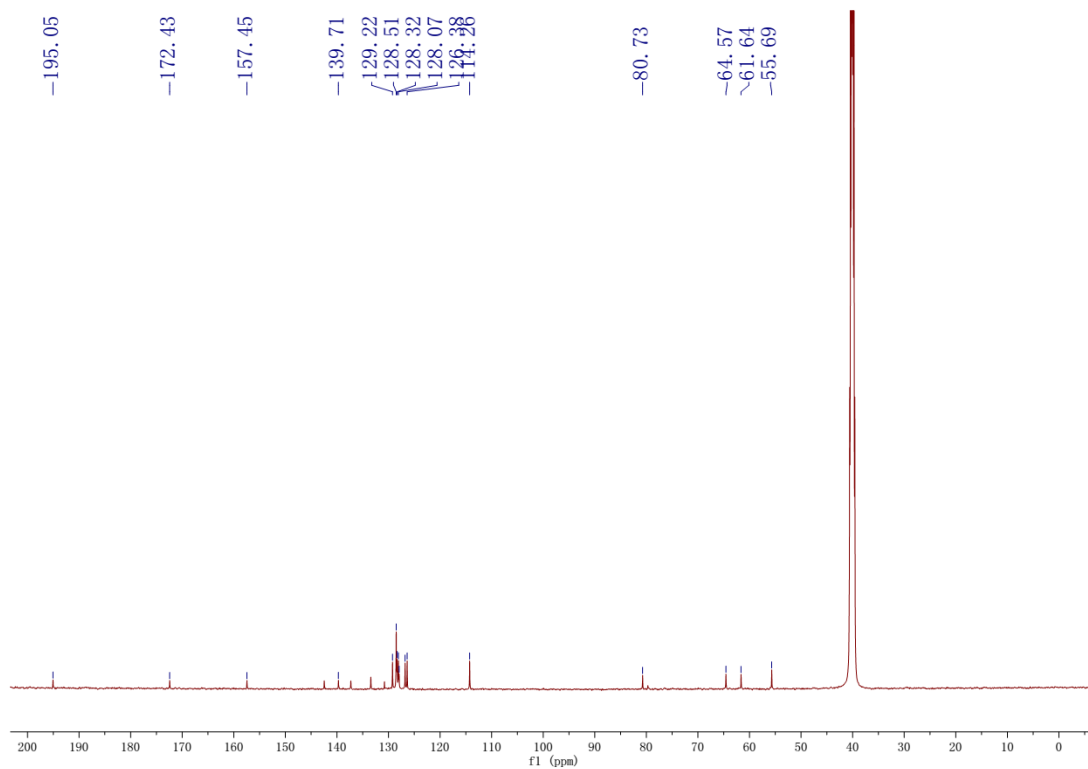

## 4. NOESY $^1\text{H}$ NMR Spectra of 3f

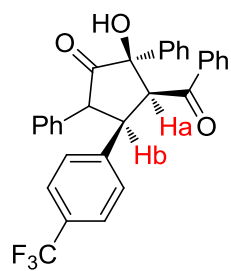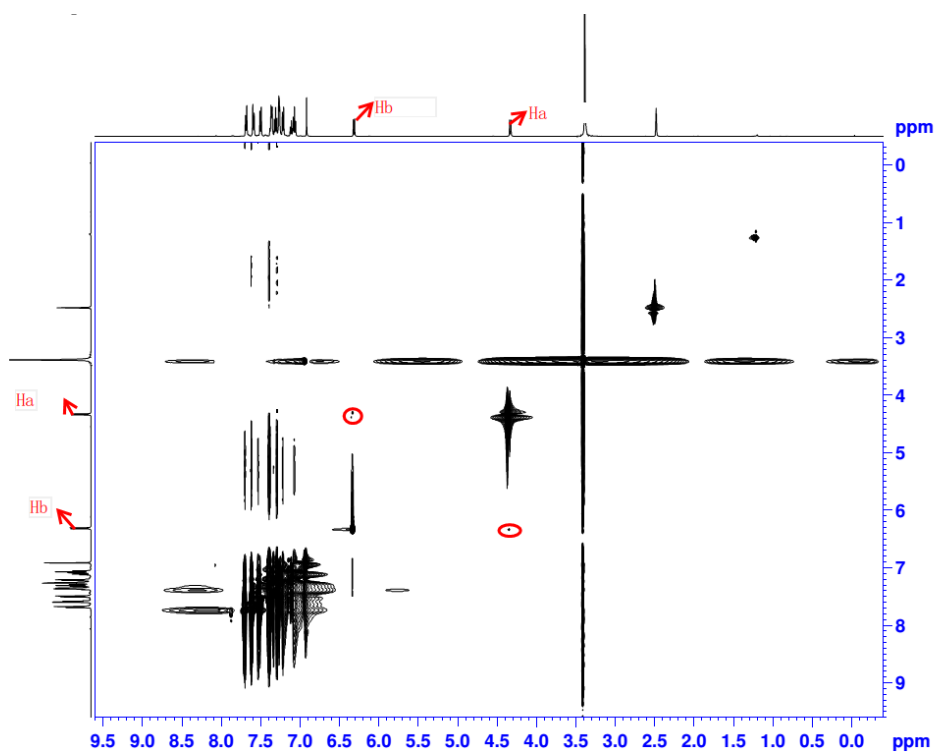

Supplement: c4nj02420f1.pdf [file c4nj02420f1.pdf]
